# Supplementary material for: Using C. elegans Forward and Reverse Genetics to Identify New Compounds with Anthelmintic Activity
Source: PubMed Central journal article supplement (PMC5068747; doi:10.1371/journal.pntd.0005058), 2016-10-18

CID 2747322 (Log10  $\mu\text{M}$ )

WormScan Score

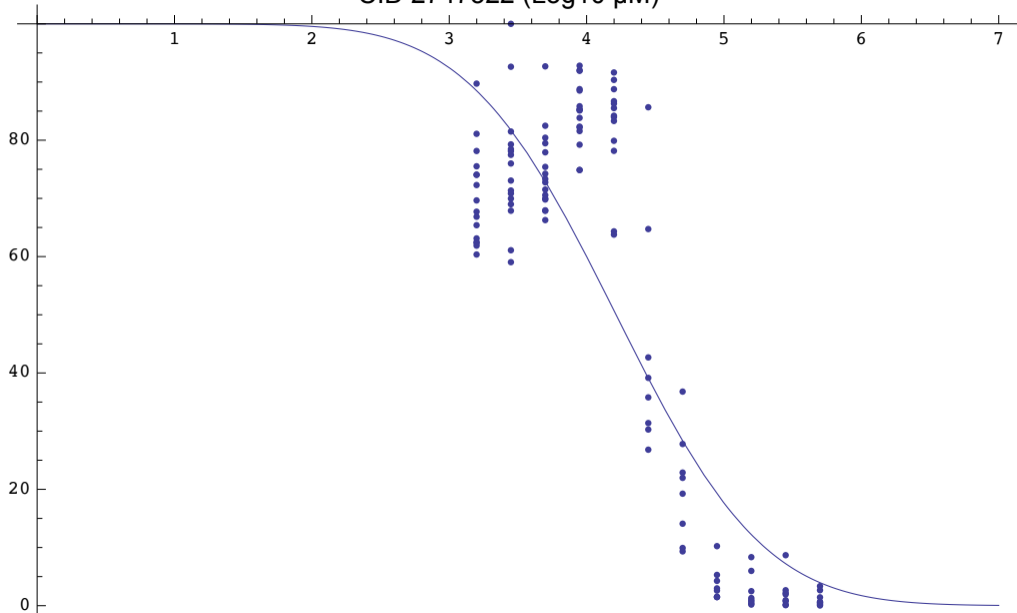

Supplement: pntd.0005058.s004.pdf [file pntd.0005058.s004.pdf]
