# Supplementary material for: Using C. elegans Forward and Reverse Genetics to Identify New Compounds with Anthelmintic Activity
Source: PubMed Central journal article supplement (PMC5068747; doi:10.1371/journal.pntd.0005058), 2016-10-18

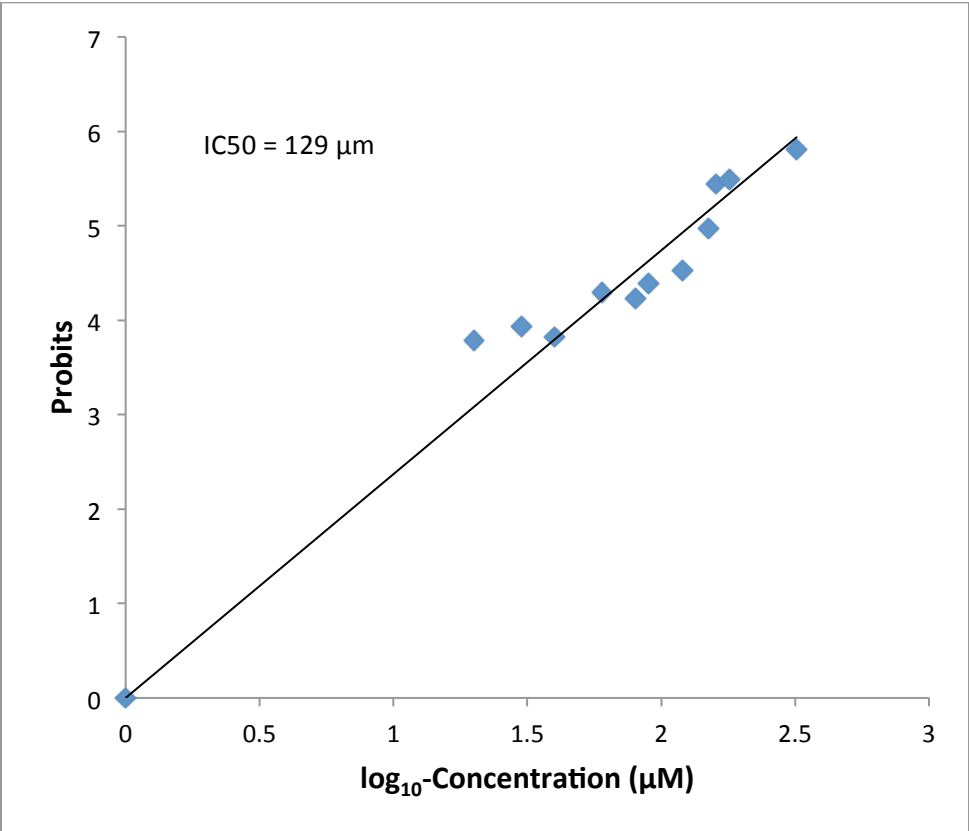

Supplement: pntd.0005058.s005.pdf [file pntd.0005058.s005.pdf]
